# Supplementary material for: Ion channels in EEG: isolating channel dysfunction in NMDA receptor antibody encephalitis
Source: PubMed Central journal article supplement (PMC6207885; doi:10.1093/brain/awy107), 2018-04-30
Supplement: awy107_brain-2017-01876-file005.pdf [file awy107_brain-2017-01876-file005.pdf]

## **Supplementary Materials**

List of Supplementary Materials

**Supplementary Figure 1:** Cross Spectral Energies – full data for fitting, sensor space and relation to model in source space

**Supplementary Figure 2:** Model comparison; Neural Mass Model with and without NMDA receptors on spiny stellate cells

**Supplementary Figure 3:** Canonical variate analysis

**Supplementary Figure 4:** DCM Parameters: Priors & Posteriors

**Supplementary Figure 5:** Alpha power in patients with encephalopathy.

**Supplementary Figure 6:** Delta/Theta model fits

**Supplementary Figure 7:** Conductance based neural mass model & NMDA Receptor effects

**Supplementary Figure 8:** Stability Analysis

**Supplementary Figure 9:** Spectral response at inhibitory interneurons

**Supplementary Table 1:** Clinical summary – NMDAR-antibody encephalitis patients

**Supplementary Table 2:** Clinical summary – non-NMDA encephalopathy patients

**Supplementary Table 3:** Clinical summary – non-encephalopathic patients

**Supplementary Table 4:** Parameter list for biophysical models with posterior parameter ranges.

**Supplementary Table 5:** Grading scales for electrographic and clinical features of encephalopathy

**Supplementary Methods:** Variational Bayesian procedure for fitting model parameters

Supplementary Figure 1

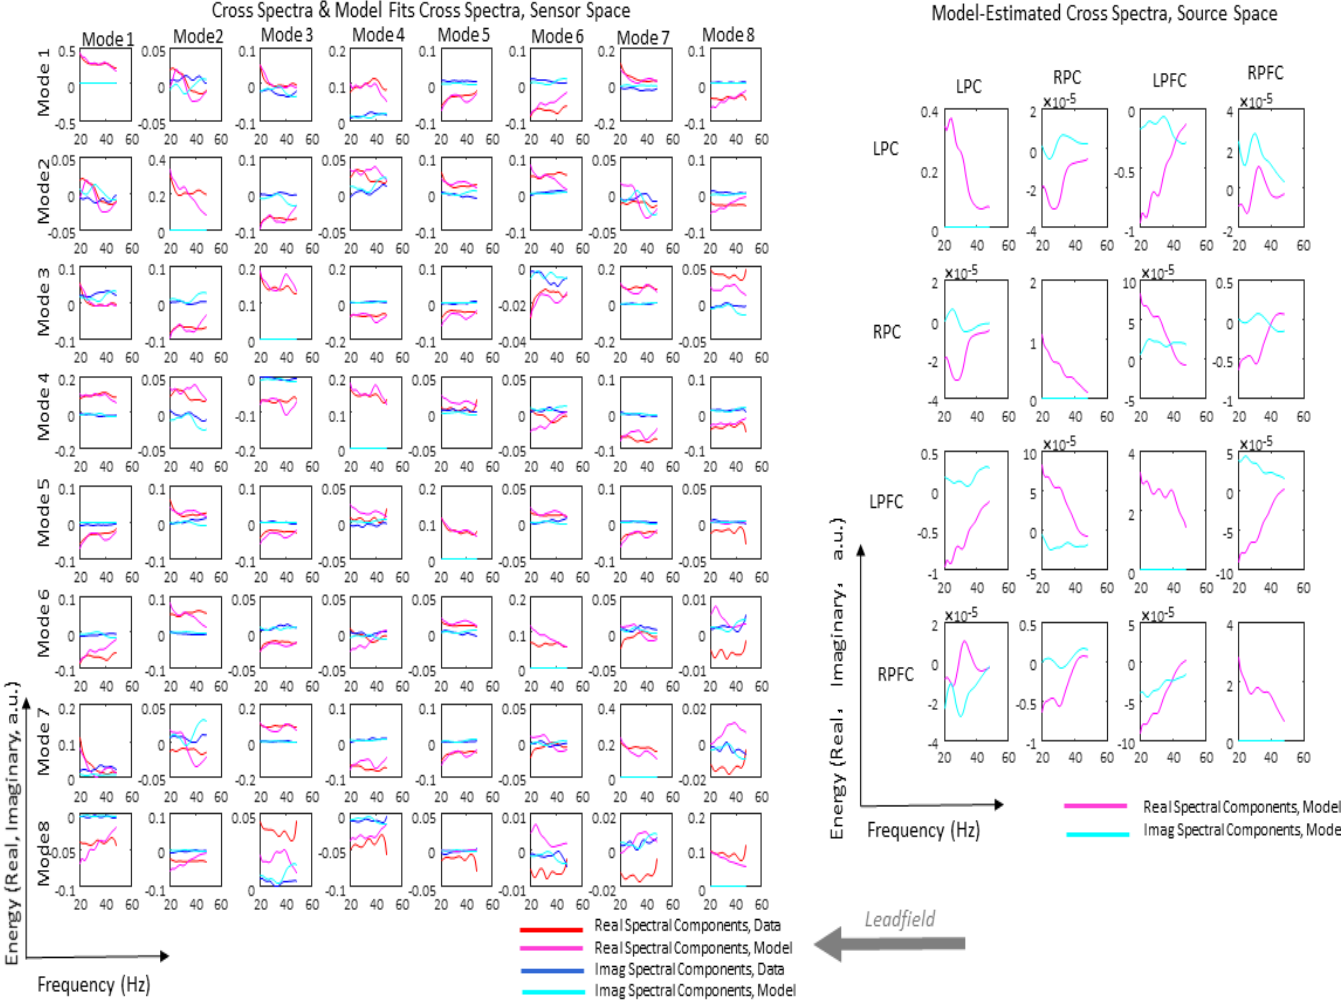

**Supplementary Figure 1: Cross Spectral Energies – full data for fitting, sensor space and relation to model in source space**

The model parameters were optimised based upon the error between data and model fit (with additional terms to account for model complexity – all contained within a single cost function known as the model’s Free Energy). The actual data employed comprised the 8 principal spatial models of the sensor space time series using a singular value decomposition (SVD). Having obtained the 8 most independent channel mixtures we then calculated the complex cross spectral energy (left panel). The model in turn operates in source space (right panel) and also produces a spectral energy measure for each of the 4 sources – defined in MNI space. To obtain the

modelled data – i.e. that which is fit to the real data; we pass the source-space (right panel) to the modes in sensor space (left panel) via a leadfield and reconfigure the mixtures of the SVD. Thus model/data error is computed on the sensor-space data; a reduced/denoised SVD representation of the individual channels.

Supplementary Figure 2

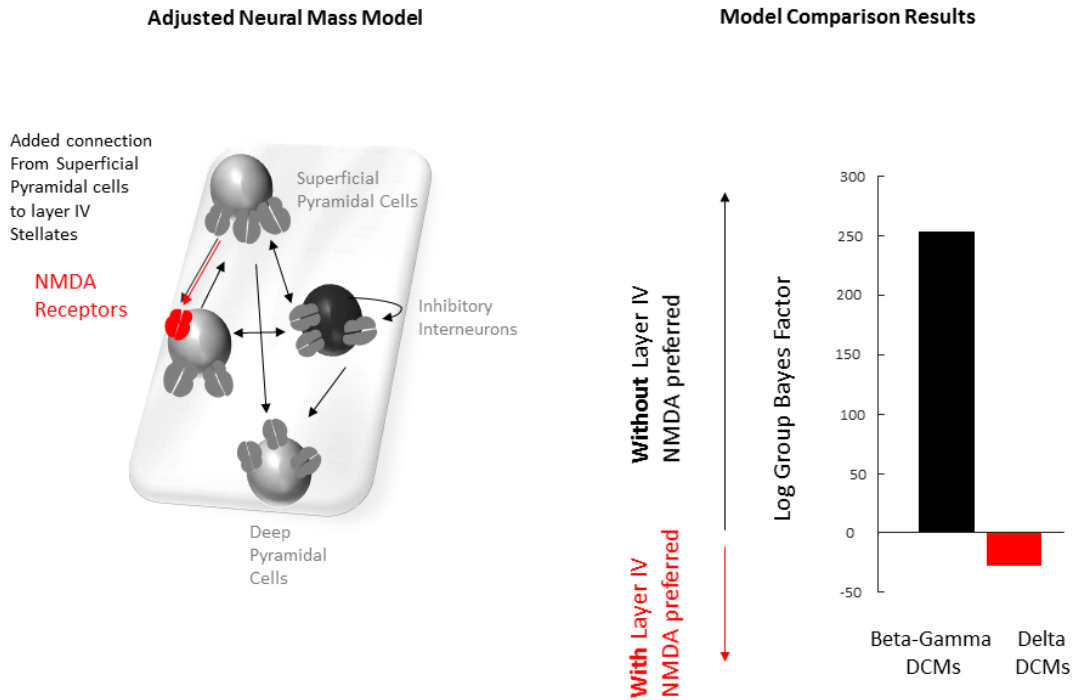

### Supplementary Figure 2: Model comparison; Neural Mass Model with and without NMDA receptors on spiny stellate cells

In order to determine whether NMDA receptors at spiny stellate cells were important dynamics to include in our model, we augmented the neural mass to include NMDA receptor dynamics on this subpopulation also - and performed a Bayesian Model Comparison. By comparing the log group Bayes factors from both groups we found that the model (with lower complexity) that did not include these receptors (our original model) outperformed the model with NMDA receptors on the Beta-Gamma data ranges. In contrast the Delta-optimised DCMs preferred the more complex model which included these NMDA receptor dynamics on spiny stellate cells.

Supplementary Figure 3

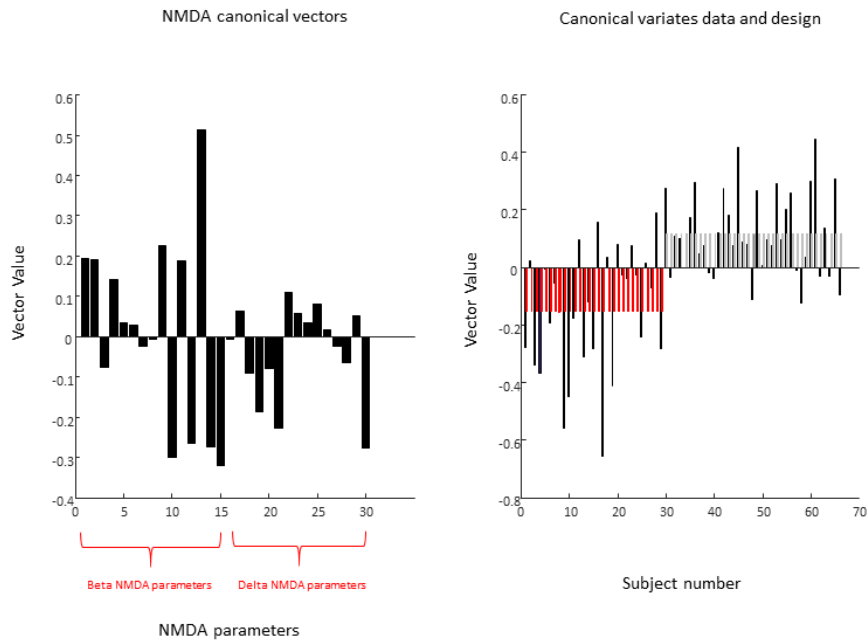

### Supplementary Figure 3: Canonical variate analysis

Using a canonical variates analysis we mapped from a multivariate space (ion channel parameter estimates from the DCM to the canonical variate (of -1 for NMDAR antibody encephalitis or +1 other pathology). On the left we show the significant canonical vector coefficient for the 30 NMDA parameters (15 for the beta model and 15 for the delta model). On the right we show the true and predicted class (red: NMDAR antibody encephalitis; grey: other pathology). See Supplementary Table 4 for list of model parameters.

Supplementary Figure 4

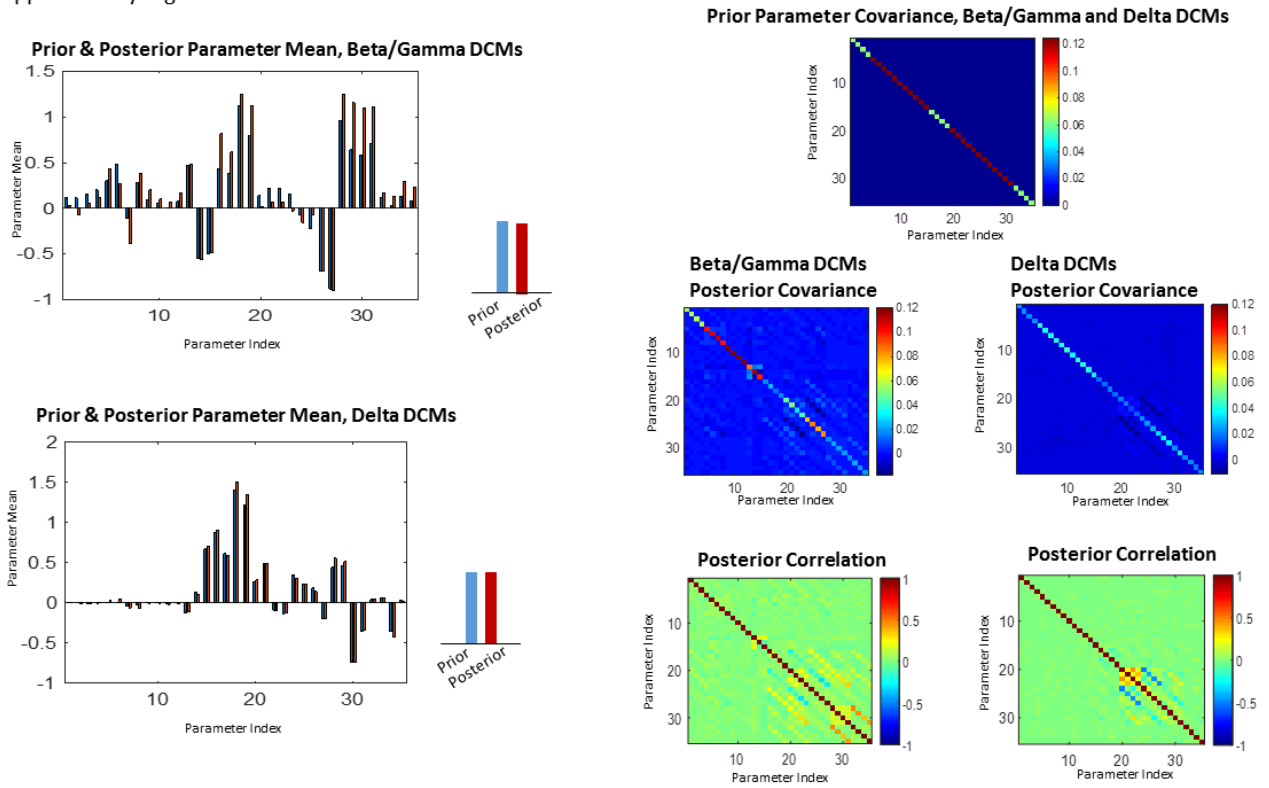

### Supplementary Figure 4: DCM Parameters: Priors & Posteriors

On the left we plot the mean prior and posterior values (blue and red bars) for each of the key model parameters (listed in Table S4, along with posterior parameter ranges). On the right we show that a priori the parameters have zero covariation. Having fit the data we find the average covariance amongst parameters is low – when represented as the posterior correlation we find that on average the parameters show an absolute correlation of 0.03 and 0.02 for the beta-gamma and delta models respectively.

Supplementary Figure 5

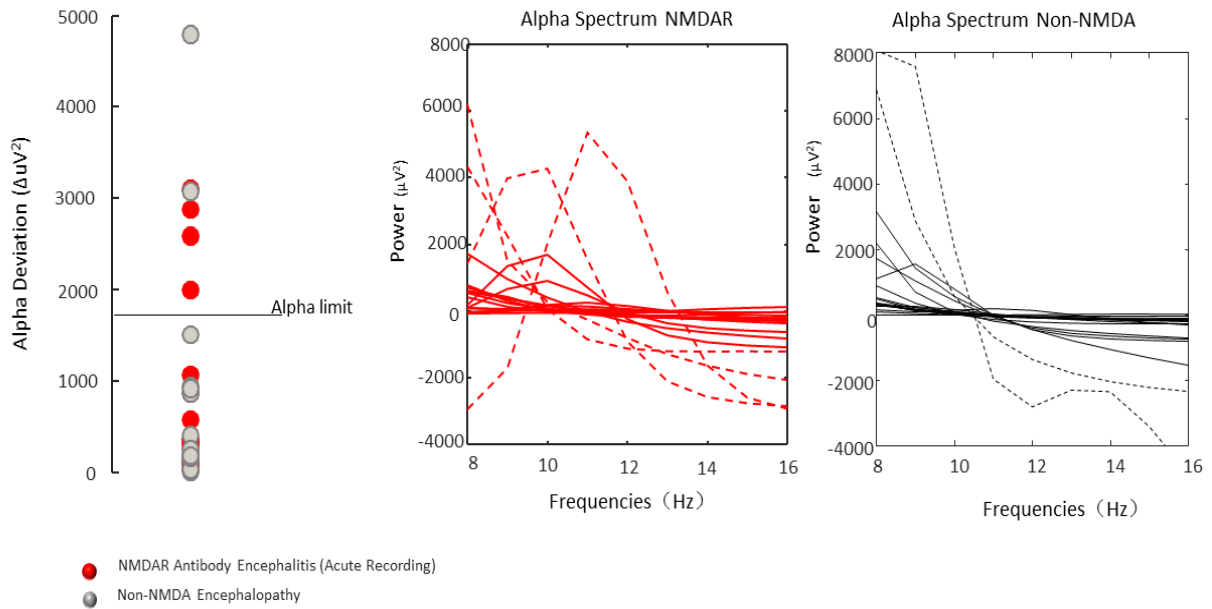

### Supplementary Figure 5: Alpha power in patients with encephalopathy.

We determined that the 4 misclassifications in the canonical variate analysis for NMDA receptor antibody encephalitis patients could be attributed to high occipital alpha power in these patients. Thus, by accounting for this confound an accurate class label could be applied to all of our acute patients.

## Supplementary Figure 6

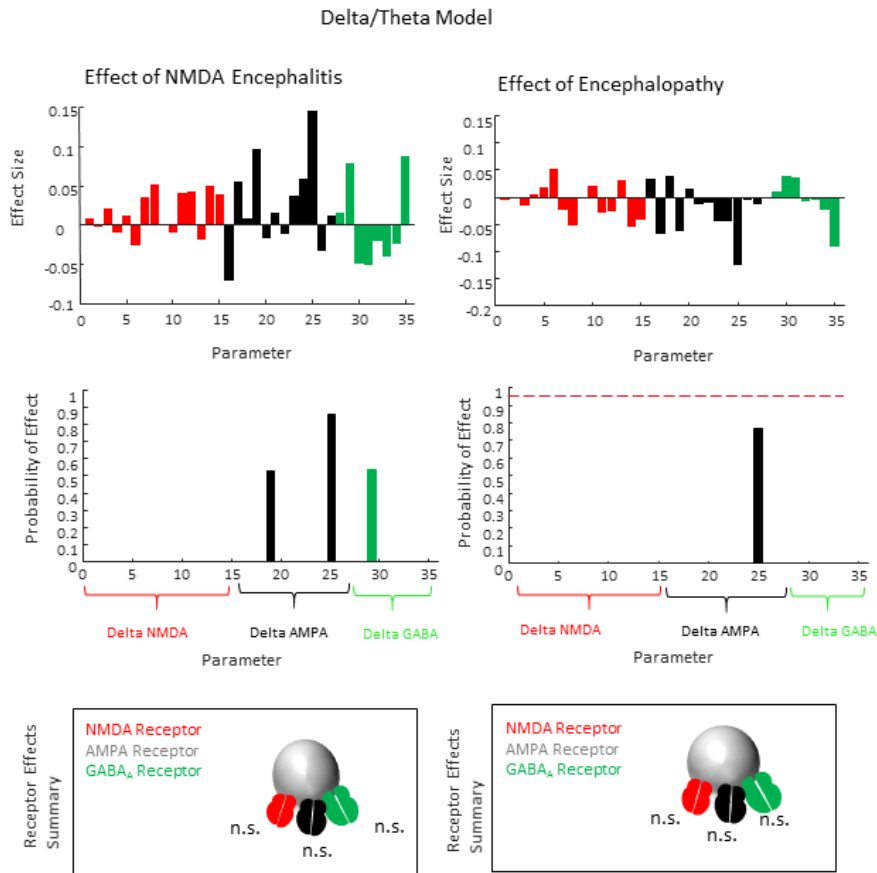

### Supplementary Figure 6: Delta/Theta model

No significant parameter effects were observed for the second level regressors of NMDAR antibody encephalitis and encephalopathy using the delta/theta model. We speculate that this may result from the poorer model fits for these DCMs as compared to the beta/gamma models (Figure 2, main text). Here the panels describe the Bayesian covariate for each effect, the best reduced model parameter combination and the probability of a group effect in each parameter  $p < 0.95$  in all cases.



Supplementary Figure 7

$$\begin{aligned} C\dot{V} &= g_{Na}(V_{Na} - V) + g_{Ca}f_{MG}(V_{Ca} - V) + g_{Cl}(V_{Cl} - V) \\ \dot{g}_{Na} &= \kappa_{AMPA}(\gamma_{ec}\sigma - g_{Na}) \\ \dot{g}_{Cl} &= \kappa_{GABA}(\gamma_{ii}\sigma - g_{Cl}) \\ \dot{g}_{Ca} &= \kappa_{NMDA}(\gamma_{ec}\sigma - g_{Ca}) \\ f_{MG} &= NMDA_{scale} / (1 + NMDA_{slope} * (\exp(V * NMDA_{sensitivity}))) \end{aligned}$$

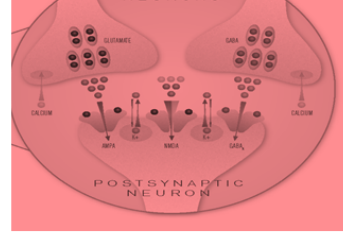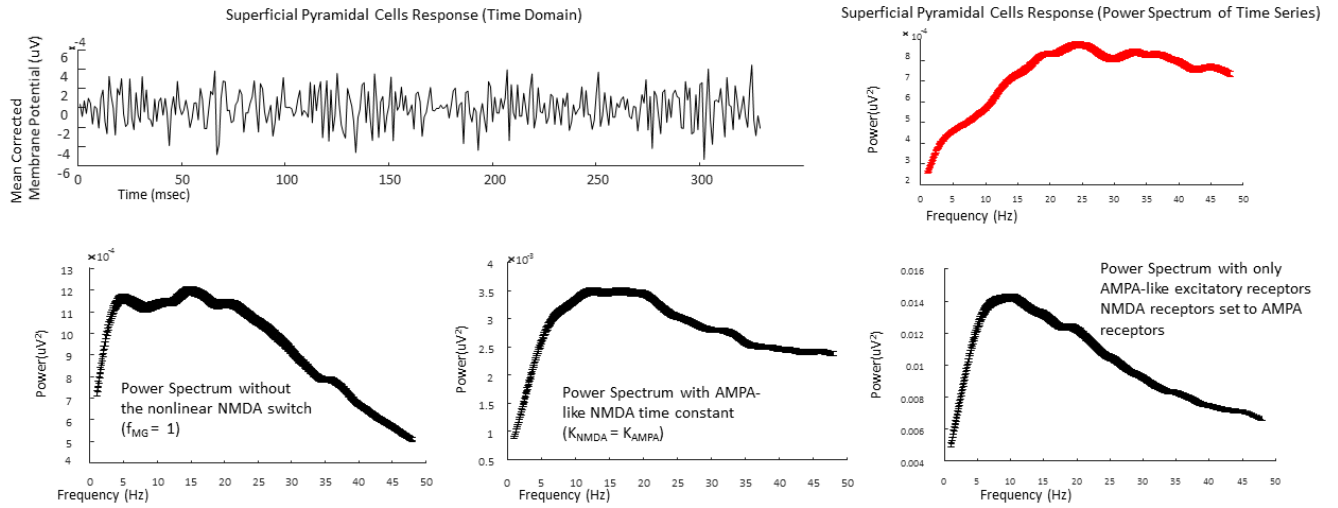

## Supplementary Figure 7: Conductance based neural mass model & NMDA Receptor Effects

At each synaptic ensemble, membrane fluctuations in depolarisation (V) are modelled as dependent upon sodium, chloride, potassium and calcium ion channel conductances. Superficial and deep pyramidal cells and inhibitory interneurons are specified with three dynamic ion channel conductances (sodium, chloride and calcium,  $g_{Na}$ ,  $g_{Ca}$ ,  $g_{Cl}$ ); stellate cells are specified with two dynamic ion channel conductances (sodium and chloride), potassium operates at a constant leak level ( $g_K$ ) (Gilbert et al. 2016). Coupling parameters link the cell populations within regions and between regions (e.g  $\gamma_{ec}$  links excitatory cells to the postsynaptic cells and  $\gamma_{ii}$  links inhibitory cells to the postsynaptic cells).

States & Parameters: C: membrane capacitance; V – membrane voltage;  $V_x$  – channel specific reversal potential for ion;  $g_x$  – channel conductance;  $K_x$  – channel specific rate constant;  $\gamma_{ii}$  – connectivity (coupling) from inhibitory interneurons;  $\gamma_{ec}$  – connectivity (coupling) from pyramidal cells;  $\sigma$  – presynaptic firing rate;  $f_{MG}$  – non-linear magnesium block ( $f_{MG}$ ); (Moran et

al. 2011). Parameters for the sigmoid are from (Durstewitz, Seamans and Sejnowski 2000). Fixed values and parameter initialisations are detailed in the main text.

Lower panels: To investigate the precise role of NMDA receptor mechanisms on spectral outputs we simulated the 4-source network for a given set of posterior parameters (extracted from one subject's optimised parameters). Specifically, we simulated 100 instances of the time-domain response using randomised pink-noise responses over 330 msec. We simulated the optimised model dynamics then progressively degraded the NMDA receptor. Interestingly, the power spectrum showed high frequencies in the presence of the NMDA receptor, while removing the nonlinear magnesium blockade switch reduced some high-frequency power. Replacing the NMDA time constant with a faster AMPA like response resulted in a reduced high frequency response – but not to the same extent. Removing both resulted in strong low-frequency (alpha-like) activity. These simulations demonstrate that given the size of the state space (64) no one-to-one mapping from time constants exists, but that the NMDA receptor and the response it generates pervades throughout the spectrum. Lines denote mean over 100 simulations, presented with the standard error of the mean.

Supplementary Figure 8

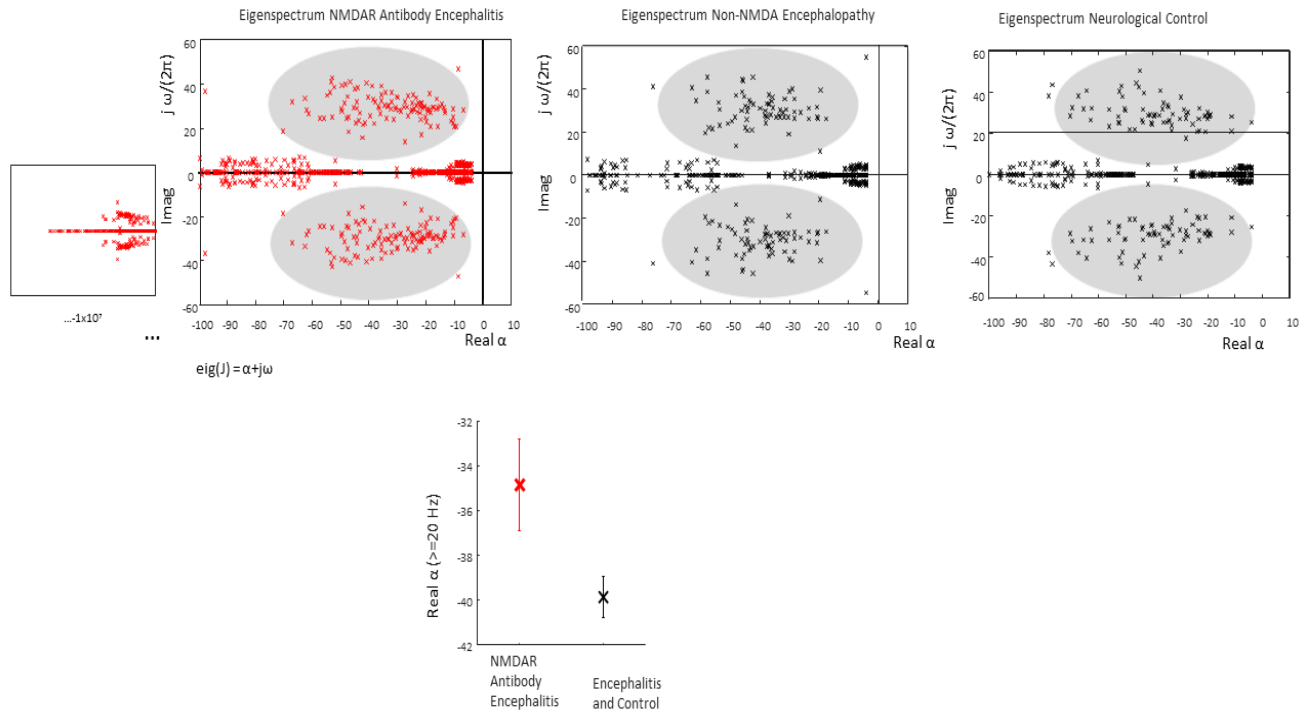

### Supplementary Figure 8: Stability Analysis

We used the Jacobian based upon the optimised parameters from each individual to produce each individual's eigenspectrum (64 eigenvalues). Plotting these in the complex plane enables us to assess the stability properties of our cohort. We found that in the higher frequencies ( $>20$  Hz), the anti-NMDA receptor encephalitis models tended to produce less stable dynamics (eigenvalues closer to the imaginary axis, shaded area). We illustrate just those eigenvalues from -100 to +10. No eigenvalues cross the imaginary axis. There was a significant difference between the real part of the NMDA-based eigenspectrum compared to the non NMDA encephalitis patients ( $p = 0.015$ , unpaired student t test).

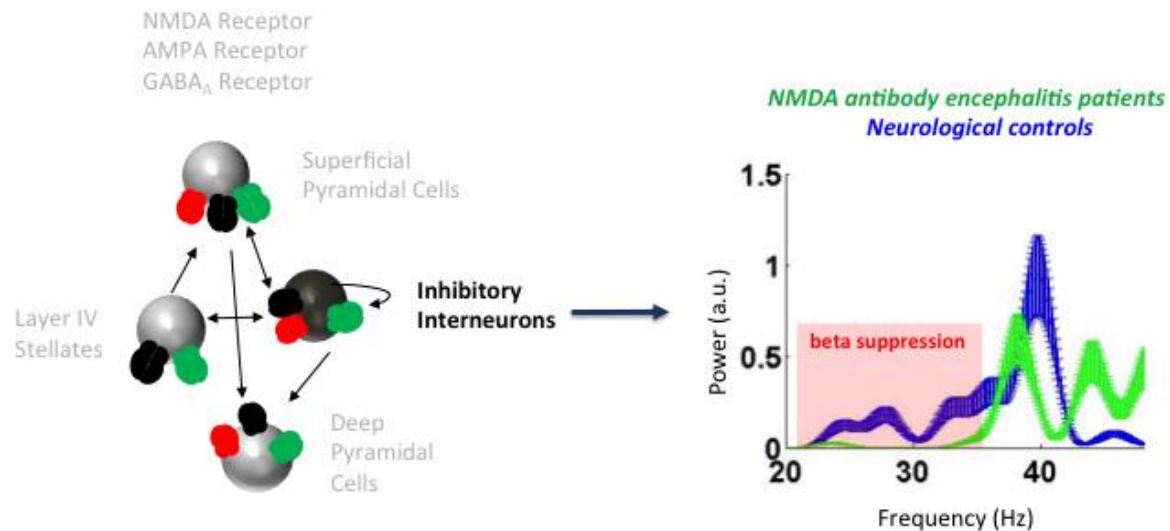

### Supplementary Figure 9: Spectral response at inhibitory interneurons

To investigate the effect of our optimised parameter values on inhibitory cell firing, we simulated the spectral outputs from this cell layer in our network across patients, based on a Fourier transformation of the time-domain response using randomised pink-noise responses over 330 msec. The power spectrum showed significant suppression of beta frequencies in NMDA receptor antibody encephalitis patients compared to neurological controls. These simulations demonstrate that there is a significant inhibition of inhibitory cell firing in our model, arising from a non-linear mixture of parameter effects. Lines denote mean over patients, with the standard error of the mean.

| Age | Sex | Clinical details                                                                                                | Diagnosis          | State during EEG                                    | Medications                       | EEG features                                                      |
|-----|-----|-----------------------------------------------------------------------------------------------------------------|--------------------|-----------------------------------------------------|-----------------------------------|-------------------------------------------------------------------|
|     |     | Time since symptom onset                                                                                        |                    | Encephalopathy grade (0-4)                          |                                   | EEG encephalopathy grade (0-15)                                   |
| 23  | M   | tremor, unsteadiness                                                                                            | NMDAR encephalitis | alert, anxious                                      | nil                               | normal                                                            |
|     |     | < 1 month                                                                                                       |                    | 1                                                   |                                   | 0                                                                 |
| 17  | F   | confusion, agitation, hemichorea-athetosis, dystonic posturing                                                  | NMDAR encephalitis | impaired concentration                              | nil                               | widespread 6Hz activity, poorly discernible PDR                   |
|     |     | initially 4 years previously (current persistent cognitive symptoms)                                            |                    | 1                                                   |                                   | 4                                                                 |
| 56  | M   | confusion                                                                                                       | NMDAR encephalitis | confused                                            | PHY, VAL                          | normal, 8-9Hz PDR, moderate 5-7Hz theta                           |
|     |     | <1 month                                                                                                        |                    | 3                                                   |                                   | 0                                                                 |
| 34  | F   | personality change, bursts of aggression, drowsiness, orofacial dyskinesia                                      | NMDAR encephalitis | drowsy, withdrawn, agitated                         | Haloperidol, Olanzapine, PHY, LEV | normal, 10-11Hz PDR, small amplitude beta                         |
|     |     | <1 month                                                                                                        |                    | 2                                                   |                                   | 0                                                                 |
| 19  | M   | intermittent unresponsiveness, confusion, drop attacks                                                          | NMDAR encephalitis | fluctuating consciousness                           | LEV                               | normal, 10Hz PDR, small amount of frontal slowing and beta        |
|     |     | <1 month                                                                                                        |                    | 3                                                   |                                   | 0                                                                 |
| 33  | M   | memory impairment, fatigue, cognitive slowing                                                                   | NMDAR encephalitis | lethargic, mildly disorientated, slow speech        | nil                               | 9Hz PDR, minor amount of underlying posterior and temporal slow   |
|     |     | 3 years                                                                                                         |                    | 2                                                   |                                   | 1                                                                 |
| 19  | F   | cognitive slowing, limb jerks, ataxia, hallucinations, psychosis, confusion, fatigue, memory difficulties, GTCS | NMDAR encephalitis | cognitive slowing, flat affect, mild disorientation | Clozapine, TOP, RET               | high amplitude delta, occ. posterior spikes, intermittent 6Hz PDR |
|     |     | 2 years                                                                                                         |                    | 1                                                   |                                   | 9                                                                 |
| 16  | M   | confusion, altered personality, disinhibition, olfactory delusions, lethargy.                                   | NMDAR encephalitis | confused, disorientated                             | nil                               | excess frontal delta, 10-11Hz PDR                                 |
|     |     | <1 month                                                                                                        |                    | 3                                                   |                                   | 1                                                                 |

|    |   |                                                                                                                          |                    |                                               |                        |                                                              |
|----|---|--------------------------------------------------------------------------------------------------------------------------|--------------------|-----------------------------------------------|------------------------|--------------------------------------------------------------|
| 30 | M | altered behaviour, paranoia, apathy, disorientation, depression, suicidal ideation                                       | NMDAR encephalitis | anxious, somnolent                            | Quetiapine, Sertraline | 7Hz PDR, widespread 4-5Hz                                    |
|    |   | 4 years (persistent mood and memory symptoms)                                                                            |                    | 1                                             |                        | 5                                                            |
| 30 | F | fluctuating consciousness                                                                                                | NMDAR encephalitis | unresponsive                                  | PHY, VAL               | bursts of slow waves, sharp theta transients and spikes      |
|    |   | <1 month                                                                                                                 |                    | 4                                             |                        | 7                                                            |
| 27 | M | fluctuating behaviour, agitation, aggression                                                                             | NMDAR encephalitis | agitated, altered affect                      | Clozapine              | normal, 10Hz PDR                                             |
|    |   | 7 years (initial encephalitic presentation; relapse<br><br><1 month with cognitive symptoms)                             |                    | 2                                             |                        | 0                                                            |
| 15 | F | headache, confusion, personality change, psychosis, insomnia, withdrawal                                                 | NMDAR encephalitis | lethargic, poor concentration                 | Melatonin              | 9-10Hz PDR, intermittent theta-delta bi-frontal and temporal |
|    |   | 2 years                                                                                                                  |                    | 1                                             |                        | 1                                                            |
| 58 | F | agitation, personality change                                                                                            | NMDAR encephalitis | awake, altered affect                         | Amitriptyline, OXC     | normal, 8Hz PDR, mid temporal beta                           |
|    |   | <1 month                                                                                                                 |                    | 2                                             |                        | 0                                                            |
| 30 | F | drowsy unresponsive episodes, emotional lability, mutism, catatonia, auditory hallucinations, GTCS, focal motor seizures | NMDAR encephalitis | Severe cognitive slowing, lethargic, confused | LEV, Olanzapine        | 8-10Hz PDR, 1.5 - 7Hz generalised intermittent slowing       |
|    |   | 6 months                                                                                                                 |                    | 3                                             |                        | 6                                                            |
| 19 | F | Reduced consciousness, emotional lability, disinhibition, left arm posturing                                             | NMDAR encephalitis | Awake but unresponsive                        | PHY                    | predominant 1-7Hz theta-delta                                |
|    |   | <1 month                                                                                                                 |                    | 3                                             |                        | 7                                                            |
| 18 | F | confusion, mutism, behavioural                                                                                           | NMDAR encephalitis | confused, impaired attention                  | CBZ                    | 6-8Hz PDR, small amount of 2-4Hz                             |

|    |   |                                                                                                                            |                       |                                                      |                                       |                                                             |
|----|---|----------------------------------------------------------------------------------------------------------------------------|-----------------------|------------------------------------------------------|---------------------------------------|-------------------------------------------------------------|
|    |   | change,<br>dysphasia,<br>amnesia                                                                                           |                       |                                                      |                                       |                                                             |
|    |   | 3 years                                                                                                                    |                       | 3                                                    |                                       | 3                                                           |
| 68 | F | confusion,<br>generalised<br>seizures,<br>aggression,<br>hemiplegia                                                        | NMDAR<br>encephalitis | alert, very mild<br>disorientation                   | nil                                   | normal, 9-10Hz PDR, single<br>temporal spike                |
|    |   | 3 months                                                                                                                   |                       | 1                                                    |                                       | 0                                                           |
| 78 | M | tremor, myoclonic<br>jerks, headache,<br>collapse, gait<br>apraxia                                                         | NMDAR<br>encephalitis | mild drowsiness                                      | Diazepam                              | 6-7Hz PDR, excess 2-5Hz<br>theta-delta                      |
|    |   | 11 months                                                                                                                  |                       | 1                                                    |                                       | 3                                                           |
| 57 | F | jerky /choreiform<br>movements,<br>depression                                                                              | NMDAR<br>encephalitis | alert, mild<br>impairment of<br>awareness            | nil                                   | normal, indistinct PDR, low<br>amplitude fast               |
|    |   | 6 years<br>(persistent<br>cognitive<br>symptoms)                                                                           |                       | 1                                                    |                                       | 0                                                           |
| 17 | F | personality<br>change, anxiety,<br>depression, focal<br>seizures                                                           | NMDAR<br>encephalitis | anxious, euphoria                                    | CBZ                                   | frontal intermittent rhythmic<br>delta                      |
|    |   | <1 month                                                                                                                   |                       | 2                                                    |                                       | 1                                                           |
| 23 | F | behavioural<br>change,<br>confusion,<br>dysphasia,<br>psychosis, focal<br>seizures,<br>involuntary<br>movements            | NMDAR<br>encephalitis | disorientated,<br>incomprehensible<br>speech         | Clonazepam,<br>Olanzapine             | diffuse delta-theta and<br>underlying low amplitude<br>beta |
|    |   | <1 month                                                                                                                   |                       | 3                                                    |                                       | 9                                                           |
| 26 | F | fluctuating<br>confusion,<br>aphasia/mutism,<br>unresponsive<br>periods, rigidity,<br>myoclonus,<br>orofacial<br>movements | NMDAR<br>encephalitis | confused, aphasic,<br>periods of<br>unresponsiveness | Clonazepam,<br>PHY, LEV,<br>Lorazepam | fluctuating theta-delta activity                            |
|    |   | <1 month                                                                                                                   |                       | 3                                                    |                                       | 7                                                           |
| 19 | F | psychosis,<br>confusion,<br>emotional lability,<br>collapse,<br>catatonia,<br>autonomic                                    | NMDAR<br>encephalitis | drowsy, emotionally<br>labile, mild confusion        | Lorazepam,<br>Olanzapine              | 6-8Hz PDR, moderate theta-<br>delta, excess beta            |

|    |   |                                                                                        |                    |                                     |                         |                                                                   |
|----|---|----------------------------------------------------------------------------------------|--------------------|-------------------------------------|-------------------------|-------------------------------------------------------------------|
|    |   | dysfunction                                                                            |                    |                                     |                         |                                                                   |
|    |   | <1 month                                                                               |                    | 2                                   |                         | 3                                                                 |
| 16 | F | secondary generalised seizures, confusion, expressive dysphasia                        | NMDAR encephalitis | confused                            | LEV                     | 9Hz PDR, left hemisphere long duration slow waves                 |
|    |   | 1 month                                                                                |                    | 3                                   |                         | 7                                                                 |
| 16 | F | confusion, depression, agitation, mutism, leg and orofacial movements, GTCS            | NMDAR encephalitis | confused                            | LEV, Lorazepam          | diffuse 2.5 - 4Hz background, excess beta                         |
|    |   | 1 month                                                                                |                    | 3                                   |                         | 9                                                                 |
| 20 | F | Psychosis with visual/auditory hallucinations, agitation, confusion, mutism, catatonia | NMDAR encephalitis | agitated, unresponsive, dysphasic   | Lorazepam, Olanzapine   | diffuse slow 1-3Hz anteriorly, excess beta posteriorly            |
|    |   | <1 month                                                                               |                    | 3                                   |                         | 9                                                                 |
| 59 | F | headache, visual hallucinations                                                        | NMDAR encephalitis | sedated, unresponsive               | Fentanyl, LEV, Propofol | theta-delta activity with right frontotemporal periodic discharge |
|    |   | <1 month                                                                               |                    | 4                                   |                         | 9                                                                 |
| 26 | M | psychosis, aggression, intermittent confusion                                          | NMDAR encephalitis | alert, mild impairment of awareness | Lorazepam               | normal, 11-12Hz PDR, moderate widespread beta                     |
|    |   | <1 month                                                                               |                    | 1                                   |                         | 0                                                                 |
| 18 | F | cognitive slowing                                                                      | NMDAR encephalitis | slightly slow processing            | LEV, VAL                | left hemispheric theta-delta activity                             |
|    |   | 2 years, non-resolving symptoms                                                        |                    | 1                                   |                         | 6                                                                 |

### Supplementary Table 1: Clinical summary – NMDAR-antibody encephalitis patients

Clinical Summary of 29 patients diagnosed with NMDAR-antibody encephalitis, based on clinical presentation and positive serology for NMDA receptor antibodies. Main clinical features are summarized, with length of course prior to EEG, and clinical status at time of EEG. EEGs were available for 19 patients in the initial/acute phase of illness (3 months or less since initial presentation or relapse of clinical symptoms); other patients were in subacute or chronic stages of illness. Clinical severity of encephalopathy is graded using the West Haven criteria. A summary of EEG features and an EEG grade based upon the degree of encephalopathic features (see Supplementary Table 5) is also given. Medications with prominent CNS effects



(antiepileptics, sedatives, anxiolytics, antipsychotics and antidepressants) taken at the time of the EEG are also listed. Abbreviations: VAL (valproate), OXC (oxcarbazepine), CBZ (carbamazepine), CLO (clobazam), LTG (lamotrigine), LEV (levetiracetam), LAC (lacosamide), PHY (phenytoin), RET (retigabine), GTCS (generalized tonic-clonic seizure), PDR (posterior dominant rhythm)

| Age | Sex | Clinical details                                            | Diagnosis                                       | State during EEG                                             | Medications                            | EEG features                                                                 |
|-----|-----|-------------------------------------------------------------|-------------------------------------------------|--------------------------------------------------------------|----------------------------------------|------------------------------------------------------------------------------|
|     |     |                                                             |                                                 | Encephalopathy grade (0-4)                                   |                                        | EEG encephalopathy grade (0-15)                                              |
| 17  | M   | encephalopathy, seizures                                    | mitochondrial encephalopathy (MERRF)            | drowsy                                                       | nil                                    | 6-7Hz PDR, runs of delta                                                     |
|     |     |                                                             |                                                 | 1                                                            |                                        | 7                                                                            |
| 24  | F   | unresponsive / comatose                                     | subacute hydrocephalus                          | ventilated, unresponsive / minimally responsive              | LEV, CBZ                               | unreactive delta-theta                                                       |
|     |     |                                                             |                                                 | 4                                                            |                                        | 10                                                                           |
| 22  | M   | collapse/LOC, confusion                                     | orbital cellulitis and septic encephalopathy    | drowsy                                                       | nil                                    | 9-10Hz PDR, mild anterior delta                                              |
|     |     |                                                             |                                                 | 1                                                            |                                        | 1                                                                            |
| 38  | M   | collapse / LOC, hepatitis                                   | drug-related encephalopathy                     | inappropriate behaviour, dysphasia                           | GBP, Opiates                           | 8Hz PDR, 4-7Hz anterior theta                                                |
|     |     |                                                             |                                                 | 1                                                            |                                        | 4                                                                            |
| 22  | F   | unconscious post cardiac arrest                             | hypoxic ischaemic encephalopathy                | sedated, ventilated, eye opening to stimuli                  | Lorazepam, Propofol                    | isoelectric periods, polymorphic slowing                                     |
|     |     |                                                             |                                                 | 3                                                            |                                        | 13                                                                           |
| 35  | F   | post status epilepticus, alcoholic liver disease            | non-specific encephalopathy, no active seizures | unconscious, sedated, intubated, minimal response to stimuli | LEV, PHY, Propofol                     | theta-delta activity                                                         |
|     |     |                                                             |                                                 | 4                                                            |                                        | 11                                                                           |
| 25  | M   | confusion                                                   | paraneoplastic (Ma2) limbic encephalitis        | drowsy                                                       | LEV, PHY                               | intermittent 8-9Hz PDR, 5-6Hz frontally                                      |
|     |     |                                                             |                                                 | 1                                                            |                                        | 6                                                                            |
| 28  | F   | epilepsy, collapse with unresponsiveness, cerebral palsy    | post-ictal encephalopathy                       | unresponsive to command, agitated                            | LEV                                    | diffuse slow wave activity, 6-8Hz PDR with occasional theta-delta transients |
|     |     |                                                             |                                                 | 3                                                            |                                        | 3                                                                            |
| 23  | M   | unresponsive episodes following head trauma                 | unspecified, post-traumatic                     | sedated, ventilated, unresponsive                            | Amitriptyline, Fentanyl, Propofol, LEV | high amplitude delta, runs of central theta                                  |
|     |     |                                                             |                                                 | 4                                                            |                                        | 9                                                                            |
| 35  | M   | encephalopathic, previous non-convulsive status epilepticus | unspecified, post-ictal state                   | unresponsive                                                 | CBZ , ZON                              | 8-14Hz PDR, delta anteriorly, excess fast                                    |
|     |     |                                                             |                                                 | 4                                                            |                                        | 9                                                                            |
| 37  | F   | collapse/LOC following air embolus, ischaemic hepatitis     | hypoxic ischaemic encephalopathy                | spontaneous eye opening, unable to follow commands           | Fentanyl                               | low amplitude, mixed polymorphic 1-8Hz                                       |
|     |     |                                                             |                                                 | 3                                                            |                                        | 12                                                                           |
| 22  | M   | unconscious following subarachnoid haemorrhage              | drug-related encephalopathy                     | sedated, unresponsive                                        | Fentanyl, Midazolam, Propofol,         | high amplitude delta, intermittent burst suppression                         |
|     |     |                                                             |                                                 | 4                                                            |                                        | 7                                                                            |
| 26  | F   | subacute                                                    | cerebral                                        | confused                                                     | nil                                    | 4-7Hz PDR, runs of                                                           |

|    |   |                                                                     |                                                 |                       |                                         |                                                       |
|----|---|---------------------------------------------------------------------|-------------------------------------------------|-----------------------|-----------------------------------------|-------------------------------------------------------|
|    |   | confusion, hearing loss                                             | vasculopathy (Susac's syndrome)                 |                       |                                         | frontotemporal delta                                  |
|    |   |                                                                     |                                                 | 3                     |                                         | 7                                                     |
| 35 | F | episodic confusion / altered behaviour                              | probable drug-related (opiate) encephalopathy   | mild disorientation   | LTG, Opiates, Amitriptyline, Fluoxetine | 8-9Hz PDR, frontotemporal 3-5Hz                       |
|    |   |                                                                     |                                                 | 1                     |                                         | 7                                                     |
| 47 | F | traumatic subarachnoid and intracerebral haemorrhage                | post-traumatic encephalopathy                   | sedated, unresponsive | PHY, Propofol, Fentanyl, Midazolam      | 5-7Hz PDR, low amplitude                              |
|    |   |                                                                     |                                                 | 4                     |                                         | 9                                                     |
| 32 | M | behavioural change, vacant episodes. Focal epilepsy, cerebral palsy | unspecified encephalopathy                      | mild disorientation   | LEV, PHY, CLO, TOP, Baclofen            | intermittent 5-7Hz, runs of central and frontal 2-4Hz |
|    |   |                                                                     |                                                 | 1                     |                                         | 7                                                     |
| 32 | M | unconscious following spontaneous subarachnoid haemorrhage          | post-haemorrhagic encephalopathy                | sedated, unresponsive | LEV, PHY, Fentanyl, Propofol            | 1-2Hz delta, frontocentral 7Hz theta                  |
|    |   |                                                                     |                                                 | 4                     |                                         | 10                                                    |
| 23 | M | auditory hallucinations, behavioural change                         | autoimmune (anti-glycine receptor) encephalitis | drowsy                | VAL, Olanzapine                         | 5-6Hz PDR, frontal delta                              |
|    |   |                                                                     |                                                 | 1                     |                                         | 4                                                     |

## **Supplementary Table 2: Clinical summary – non-NMDA encephalopathy patients**

Clinical Summary of 18 patients with acute encephalopathies, from a variety of metabolic, toxic, inflammatory and structural causes. Main clinical features are summarized, with clinical status at time of EEG and clinical severity of encephalopathy graded using the West Haven criteria. A summary of EEG features and an EEG grade based upon the degree of encephalopathic features (see Supplementary Table 5) is also given. Medications with prominent CNS effects (including antiepileptics, anaesthetics, anxiolytics, antipsychotics, analgesics and antidepressants) taken at the time of the EEG are also listed. Abbreviations: VAL (valproate), CBZ (carbamazepine), OXC (oxcarbazepine), CLO (clobazam), LTG (lamotrigine), LEV (levetiracetam), LAC (lacosamide), PHY (phenytoin) ZON (zonisamide), TOP (topiramate). GTCS (generalized tonic clonic seizure). PDR (posterior dominant rhythm). MERRF (mitochondrial epilepsy with ragged red fibres).

| <i>Age</i> | <i>Sex</i> | <i>Clinical details</i>           | <i>Diagnosis</i>                                   | <i>State during EEG</i> | <i>Medications</i>  | <i>EEG features</i>                                      |
|------------|------------|-----------------------------------|----------------------------------------------------|-------------------------|---------------------|----------------------------------------------------------|
| 20         | F          | collapse/LOC                      | syncope                                            | alert                   | nil                 | 9-10Hz PDR, temporal theta                               |
| 24         | F          | collapse/LOC                      | probable syncope                                   | alert                   | nil                 | 10Hz PDR                                                 |
| 32         | F          | altered consciousness and amnesia | focal onset seizure (temporal lobe epilepsy)       | alert                   | nil                 | 10Hz PDR, sharp temporal transients                      |
| 20         | M          | behavioural change, autism        | unspecified, no evidence of epilepsy               | alert                   | nil                 | 9-10Hz PDR, frontal theta                                |
| 18         | F          | collapse/LOC                      | probable syncope                                   | alert                   | nil                 | 10Hz PDR                                                 |
| 25         | F          | collapse/LOC                      | possible isolated seizure                          | alert                   | nil                 | 10Hz PDR                                                 |
| 18         | F          | altered behaviour, low mood       | unspecified, no evidence of epilepsy               | alert                   | nil                 | 11Hz PDR                                                 |
| 31         | F          | limb jerks                        | probable psychogenic movement disorder             | alert                   | nil                 | 9Hz PDR                                                  |
| 23         | M          | LOC with head version             | focal onset seizure                                | alert                   | nil                 | 9Hz PDR                                                  |
| 20         | M          | LOC                               | primary generalised epilepsy                       | alert                   | nil                 | 8-10Hz PDR, single generalised poly-spike wave discharge |
| 23         | F          | LOC with visual aura              | unspecified, no clear evidence of epilepsy         | alert                   | VAL                 | 9-10Hz PDR                                               |
| 32         | F          | nocturnal generalised seizures    | primary generalised epilepsy                       | alert                   | CLO, OXC            | 9-10Hz PDR, frontal theta                                |
| 17         | F          | nocturnal generalised seizures    | primary generalised epilepsy with photosensitivity | alert                   | LTG                 | 10Hz PDR                                                 |
| 22         | F          | cephalic and autonomic aura, LOC  | probable focal onset seizure                       | alert                   | nil                 | 11-12Hz PDR, mid temporal theta                          |
| 18         | F          | limb jerks                        | non-epileptic myoclonus                            | alert                   | Citalopram, Codeine | 10-11Hz PDR, central theta                               |
| 36         | M          | generalised tonic-clonic seizure  | alcohol withdrawal seizure                         | alert                   | Mirtazepam          | 9-10Hz PDR, frontocentral theta-delta                    |
| 39         | F          | collapse/LOC                      | probable syncope                                   | alert                   | nil                 | 9Hz PDR                                                  |
| 38         | M          | limb paraesthesiae, LOC           | focal onset seizure                                | alert                   | LEV, Methadone      | 7-8Hz PDR, frontal theta-delta                           |

### **Supplementary Table 3: Clinical summary – non-encephalopathic patients**

Clinical Summary of 18 non-encephalopathic neurological patients. Main clinical features are summarized, including clinical status at time of EEG. A summary of EEG features is also given. Medications with prominent CNS effects (antiepileptics, sedatives, anxiolytics, antipsychotics and antidepressants) taken at the time of the EEG are also listed. Abbreviations: VAL (valproate), OXC (oxcarbazepine), CLO (clobazam), LTG (lamotrigine), LEV (levetiracetam),

LAC (lacosamide), PHY (phenytoin). GTCS (generalized tonic clonic seizure). PDR (posterior dominant rhythm).

| Parameter Number       | Description                                                      | DCM Posterior parameter values |        |               |         |
|------------------------|------------------------------------------------------------------|--------------------------------|--------|---------------|---------|
|                        |                                                                  | Beta (20-48Hz)                 |        | Delta (1-4Hz) |         |
|                        |                                                                  | Min                            | Max    | Min           | Max     |
| <b>NMDA Parameters</b> |                                                                  |                                |        |               |         |
| 1                      | RATE OF NMDA CHANNEL OPENING LEFT PARIETAL CORTEX (LPC)          | 0.448                          | 1.5306 | 0.8122        | 1.2039  |
| 2                      | RATE OF NMDA CHANNEL OPENING RIGHT PARIETAL CORTEX (RPC)         | 0.2843                         | 1.478  | 0.6164        | 1.0265  |
| 3                      | RATE OF NMDA CHANNEL OPENING LEFT PREFRONTAL CORTEX (LPFC)       | 0.4015                         | 4.3075 | 0.8855        | 1.622   |
| 4                      | RATE OF NMDA CHANNEL OPENING RIGHT PREFRONTAL CORTEX (RPFC)      | 0.423                          | 4.7258 | 0.9099        | 1.9547  |
| 5                      | INTRINSIC CONNECTIONS TO NMDA RECEPTORS (EXCITATORY CELLS (LPC)  | 0.4253                         | 3.4478 | 0.9632        | 2.5559  |
| 6                      | INTRINSIC CONNECTIONS TO NMDA RECEPTORS (EXCITATORY CELLS (RPC)  | 0.5283                         | 2.6944 | 0.9695        | 2.1356  |
| 7                      | INTRINSIC CONNECTIONS TO NMDA RECEPTORS (EXCITATORY CELLS (LPFC) | 0.1496                         | 2.4817 | 0.5322        | 1.0834  |
| 8                      | INTRINSIC CONNECTIONS TO NMDA RECEPTORS (EXCITATORY CELLS (RPFC) | 0.3735                         | 4.8616 | 0.2917        | 1.2138  |
| 9                      | INTRINSIC CONNECTIONS TO NMDA RECEPTORS (INHIBITORY CELLS (LPC)  | 0.7744                         | 3.8477 | 0.8284        | 1.0506  |
| 10                     | INTRINSIC CONNECTIONS TO NMDA RECEPTORS (INHIBITORY CELLS (RPC)  | 0.6256                         | 4.7342 | 0.6332        | 1.221   |
| 11                     | INTRINSIC CONNECTIONS TO NMDA RECEPTORS (INHIBITORY CELLS (LPFC) | 0.4921                         | 4.3832 | 0.6269        | 1.6281  |
| 12                     | INTRINSIC CONNECTIONS TO NMDA RECEPTORS (INHIBITORY CELLS (RPFC) | 0.8832                         | 2.186  | 0.7145        | 1.28    |
| 13                     | MAGNESIUM BLOCK VOLTAGE GATE AMPLITUDE                           | 1.0435                         | 2.0977 | 0.745         | 1.687   |
| 14                     | MAGNESIUM BLOCK VOLTAGE GATE SLOPE                               | 0.3382                         | 0.9127 | 0.5895        | 1.3298  |
| 15                     | MAGNESIUM BLOCK VOLTAGE GATE VOLTAGE SENSITIVITY                 | 0.351                          | 1.2881 | 1.3187        | 4.466   |
| <b>AMPA Parameters</b> |                                                                  |                                |        |               |         |
| 16                     | RATE OF AMPA CHANNEL OPENING LPC                                 | 1.1047                         | 6.3948 | 0.9435        | 4.8359  |
| 17                     | RATE OF AMPA CHANNEL OPENING RPC                                 | 0.6603                         | 7.2411 | 1.034         | 2.7401  |
| 18                     | RATE OF AMPA CHANNEL OPENING LPFC                                | 1.9646                         | 5.1669 | 2.5698        | 11.2285 |
| 19                     | RATE OF AMPA CHANNEL OPENING RPFC                                | 1.3837                         | 5.5957 | 2.8258        | 8.3446  |
| 20                     | INTRINSIC CONNECTIONS TO AMPA RECEPTORS LPC                      | 0.2439                         | 1.3058 | 1.2013        | 2.1775  |
| 21                     | INTRINSIC CONNECTIONS TO AMPA RECEPTORS RPC                      | 0.5486                         | 1.3324 | 1.2439        | 1.9171  |
| 22                     | INTRINSIC CONNECTIONS TO AMPA RECEPTORS LPFC                     | 0.4747                         | 1.4634 | 0.8304        | 1.096   |
| 23                     | INTRINSIC CONNECTIONS TO AMPA RECEPTORS RPFC                     | 0.3707                         | 1.3728 | 0.7715        | 1.0049  |
| 24                     | EXTRINSIC CONNECTION LPC TO LPFC                                 | 0.1712                         | 1.3405 | 0.831         | 1.9753  |
| 25                     | EXTRINSIC CONNECTION RPC TO RPFC                                 | 0.2147                         | 1.9205 | 0.6799        | 2.4789  |
| 26                     | EXTRINSIC CONNECTION LPFC TO LPC                                 | 0.318                          | 1.16   | 0.5732        | 1.2997  |
| 27                     | EXTRINSIC CONNECTION RPFC TO RPC                                 | 0.2097                         | 0.902  | 0.7134        | 1.0634  |
| <b>GABA Parameters</b> |                                                                  |                                |        |               |         |
| 28                     | INTRINSIC CONNECTIONS TO GABA RECEPTORS LPC                      | 2.3473                         | 6.5402 | 0.8576        | 5.188   |
| 29                     | INTRINSIC CONNECTIONS TO GABA RECEPTORS RPC                      | 1.6968                         | 6.482  | 0.7927        | 12.9927 |
| 30                     | INTRINSIC CONNECTIONS TO GABA RECEPTORS LPFC                     | 0.432                          | 5.3873 | 0.2922        | 0.7394  |
| 31                     | INTRINSIC CONNECTIONS TO GABA RECEPTORS RPFC                     | 1.0399                         | 8.7701 | 0.455         | 1.0886  |
| 32                     | RATE OF GABA CHANNEL OPENING LPC                                 | 0.5873                         | 6.5809 | 0.825         | 1.2114  |
| 33                     | RATE OF GABA CHANNEL OPENING RPC                                 | 0.6503                         | 3.626  | 0.3819        | 1.817   |
| 34                     | RATE OF GABA CHANNEL OPENING LPFC                                | 0.8206                         | 5.4654 | 0.1998        | 1.1091  |
| 35                     | RATE OF GABA CHANNEL OPENING RPFC                                | 0.4655                         | 3.6615 | 0.3776        | 1.4603  |

**Supplementary Table 4: Parameter list for biophysical models.**

NMDA, AMPA and GABA receptor model parameters, posterior parameter ranges.

|    |                                                                      |
|----|----------------------------------------------------------------------|
| 0  | normal                                                               |
| 1  | normal background with intermittent slowing                          |
| 2  | slow background 7-8Hz without theta-delta waves                      |
| 3  | slow background 7-8Hz with theta-delta waves                         |
| 4  | 4-6Hz background without theta-delta waves                           |
| 5  | 4-6Hz background with theta-delta waves                              |
| 6  | dominant theta-delta with normal background activity                 |
| 7  | dominant theta-delta with slow background activity                   |
| 8  | dominant delta with normal background activity                       |
| 9  | dominant delta with slow background activity                         |
| 10 | moderate to high amplitude delta >50uV with no background reactivity |
| 11 | low amplitude <50uV delta with no background reactivity              |
| 12 | burst suppression with suppression period <5s                        |
| 13 | burst suppression with suppression period >5s                        |
| 14 | near electrocerebral silence                                         |
| 15 | electrocerebral silence                                              |

**Supplementary Table 5: Grading scales for electrographic and clinical features of encephalopathy**

15 point grading scale: electrographic features of encephalopathy correlating with low to high severity.



## Supplementary Methods

To estimate model parameters,  $\theta$ , DCM employs a variational Bayesian approach using a mean field partition to iteratively update a multivariate Gaussian over model parameters and a gaussian hyperparameter that models the level of additive measurement noise,  $\gamma$ . This procedure minimizes a precision weighted square error term and a complexity parameter – the cost function is known as the Free Energy,  $F$  given the complex spectral energy,  $y$  and the model prediction  $h(\mu)$ . The complexity penalty is the Kullback Leibler divergence between the prior  $N \sim (\mu_\theta, C_\theta)$  and posterior densities,  $N \sim (\mu_{\theta|y}, C_{\theta|y})$ , penalizing more independence amongst the parameters, dependencies amongst posterior parameters and deviations in the posterior mean from the prior mean.

$$F = \frac{1}{2}(y - h)'(y - h) + \frac{1}{2}\ln|C_\theta| - \frac{1}{2}\ln|C_{\theta|y}| + \frac{1}{2}(\mu_{\theta|y} - \mu_\theta)'C_\theta^{-1}(\mu_{\theta|y} - \mu_\theta)$$

Following Friston et al., (2007) one performs an E-step of gradient descent on the free energy to optimise the posterior moments. The M-step performs a descent on the free energy to update the hyperparameter. This is repeated until convergence where the objective function  $F$  changes by less than  $10^{-2}$ .

**Pseudo code, see (Friston et al. 2007):**

### E-step

$$\begin{aligned} C_{\theta|y}^{-1} &= h' C_{\theta|y}^{-1} h + C_\theta^{-1} \\ \Delta \mu_{\theta|y} &= -C_{\theta|y}^{-1} (h' C_{\theta|y}^{-1} (y - h) + C_\theta^{-1} (\mu_{\theta|y} - \mu_\theta)) \end{aligned}$$

### M-step

$$\begin{aligned} I &= \frac{1}{2} \text{tr} \left( P \left( (y - h)'(y - h) - \text{Id} * \gamma + h C_{\theta|y} h \right) \right) \\ P &= \frac{\delta C_{\theta|y}^{-1}}{\delta \gamma} \\ \Delta \gamma &= - \left( \frac{\delta I}{\delta \gamma} \right)^{-1} I \end{aligned}$$

We plot the prior and posterior means and covariances in figure S3. From the posterior correlation matrices (a normalized covariance matrix to reveal parameter dependencies) we find that the mean absolute correlation is 0.03 for the beta/gamma models and 0.02 for the delta models. Hence, we can conclude that our key parameters contribute differentially to the signal and are locally identifiable. However, given the presence of local minima in these models, the identifiability is local in the neighbourhood of  $F$  (See definition 2 in (Ljung and Glad 1994)).

## References

- Durstewitz, D., J. K. Seamans & T. J. Sejnowski (2000) Dopamine-mediated stabilization of delay-period activity in a network model of prefrontal cortex. *Journal of neurophysiology*, 83, 1733-1750.
- Friston, K., J. Mattout, N. Trujillo-Barreto, J. Ashburner & W. Penny (2007) Variational free energy and the Laplace approximation. *Neuroimage*, 34, 220-234.
- Gilbert, J. R., M. Symmonds, M. G. Hanna, R. J. Dolan, K. J. Friston & R. J. Moran (2016) Profiling neuronal ion channelopathies with non-invasive brain imaging and dynamic causal models: case studies of single gene mutations. *Neuroimage*, 124, 43-53.
- Ljung, L. & T. Glad (1994) On global identifiability for arbitrary model parametrizations. *Automatica*, 30, 265-276.
- Moran, R. J., K. E. Stephan, R. J. Dolan & K. J. Friston (2011) Consistent spectral predictors for dynamic causal models of steady-state responses. *Neuroimage*, 55, 1694-1708.
